# Supplementary material
Source: publisher site journal article supplement (https://www.spandidos-publications.com/7259/downloadSupplementary)
Supplement: Supplementary file 1 [file downloadSupplementary]

## Sheet: Sheet1
Table SII. Top 200 sideroflexin 1-related genes from Gene Expression Profiling Interactive Analysis 2.
Gene symbol	Gene ID	PCC
EPT1	ENSG00000138018.17	0.54
OPA1	ENSG00000198836.8	0.54
TNPO1	ENSG00000083312.17	0.53
KPNA1	ENSG00000114030.12	0.53
LSM12P1	ENSG00000232024.2	0.53
MAPK1	ENSG00000100030.14	0.51
KIAA1715	ENSG00000144320.13	0.5
SLC25A46	ENSG00000164209.16	0.5
PPP2CA	ENSG00000113575.9	0.5
EXOC5	ENSG00000070367.15	0.5
GNA13	ENSG00000120063.9	0.5
NDUFS1	ENSG00000023228.13	0.5
G3BP1	ENSG00000145907.14	0.49
FAF2	ENSG00000113194.12	0.49
PAK2	ENSG00000180370.10	0.49
MIEF1	ENSG00000100335.12	0.49
SMAD5	ENSG00000113658.16	0.48
PCYT1A	ENSG00000161217.11	0.48
DIP2B	ENSG00000066084.12	0.48
MFAP3	ENSG00000037749.11	0.48
NMD3	ENSG00000169251.12	0.48
GTF2H3	ENSG00000111358.13	0.47
ACTR3	ENSG00000115091.11	0.47
LRRC58	ENSG00000163428.3	0.47
KPNA4	ENSG00000186432.8	0.47
LIN54	ENSG00000189308.10	0.46
FYTTD1	ENSG00000122068.12	0.46
ZFP91	ENSG00000186660.14	0.46
L2HGDH	ENSG00000087299.11	0.46
PHAX	ENSG00000164902.13	0.46
UBQLN1	ENSG00000135018.13	0.46
CANX	ENSG00000127022.14	0.46
ARL5A	ENSG00000162980.16	0.46
CTDSPL2	ENSG00000137770.13	0.46
PGGT1B	ENSG00000164219.9	0.45
SEC24A	ENSG00000113615.12	0.45
PSME3	ENSG00000131467.10	0.45
PANK3	ENSG00000120137.6	0.45
DHFRP1	ENSG00000188985.6	0.45
MRPL19	ENSG00000115364.13	0.45
RAB10	ENSG00000084733.10	0.45
KIF2A	ENSG00000068796.16	0.45
RP11-490H24.5	ENSG00000216285.5	0.45
DDX18	ENSG00000088205.12	0.45
FBXW11	ENSG00000072803.17	0.45
AP1G1	ENSG00000166747.12	0.44
ZNF148	ENSG00000163848.18	0.44
UBXN7	ENSG00000163960.11	0.44
PIK3CA	ENSG00000121879.3	0.44
EIF5	ENSG00000100664.10	0.44
CLPX	ENSG00000166855.9	0.44
LARP4	ENSG00000161813.20	0.44
RIT1	ENSG00000143622.10	0.44
EGLN1	ENSG00000135766.8	0.44
LARP1	ENSG00000155506.16	0.44
TUBGCP4	ENSG00000137822.12	0.44
UBA5	ENSG00000081307.12	0.44
CPSF2	ENSG00000165934.12	0.44
CDC23	ENSG00000094880.10	0.44
CEP97	ENSG00000182504.10	0.44
TMX1	ENSG00000139921.12	0.44
WDR36	ENSG00000134987.11	0.44
GOSR1	ENSG00000108587.14	0.43
RBM12	ENSG00000244462.7	0.43
NLN	ENSG00000123213.22	0.43
GSK3B	ENSG00000082701.14	0.43
INTS2	ENSG00000108506.11	0.43
HSPA4L	ENSG00000164070.11	0.43
USP10	ENSG00000103194.15	0.43
SPAST	ENSG00000021574.11	0.43
PRPF40A	ENSG00000196504.15	0.43
ATP2A2	ENSG00000174437.16	0.43
DCAF7	ENSG00000136485.14	0.43
NUDT21	ENSG00000167005.13	0.43
CLASP1	ENSG00000074054.17	0.43
YIPF5	ENSG00000145817.16	0.43
CKAP5	ENSG00000175216.14	0.43
STARD7	ENSG00000084090.13	0.43
SNX13	ENSG00000071189.21	0.43
MTMR1	ENSG00000063601.16	0.43
TMEM167A	ENSG00000174695.9	0.43
CYB5R4	ENSG00000065615.13	0.43
USP38	ENSG00000170185.9	0.43
CSNK1G3	ENSG00000151292.17	0.43
SEC24B	ENSG00000138802.11	0.43
DLG1	ENSG00000075711.20	0.43
CSNK2A1	ENSG00000101266.16	0.43
AP5M1	ENSG00000053770.11	0.43
RP11-449H3.3	ENSG00000275740.1	0.43
MAPK9	ENSG00000050748.17	0.43
IARS	ENSG00000196305.17	0.43
ZSCAN29	ENSG00000140265.12	0.43
KDSR	ENSG00000119537.15	0.43
OGFOD1	ENSG00000087263.16	0.43
RPE	ENSG00000197713.14	0.43
HAUS2	ENSG00000137814.9	0.42
PDE12	ENSG00000174840.8	0.42
PAFAH1B1	ENSG00000007168.12	0.42
EIF2S1	ENSG00000134001.12	0.42
SMEK2	ENSG00000275052.4	0.42
TROVE2	ENSG00000116747.12	0.42
PGAM1	ENSG00000171314.8	0.42
ACBD5	ENSG00000107897.18	0.42
STRN	ENSG00000115808.11	0.42
ADNP2	ENSG00000101544.8	0.42
CNOT6	ENSG00000113300.11	0.42
BIVM-ERCC5	ENSG00000270181.1	0.42
APOOL	ENSG00000155008.13	0.42
NF1	ENSG00000196712.16	0.42
FKTN	ENSG00000106692.13	0.42
MAPK6	ENSG00000069956.11	0.42
CAMSAP1	ENSG00000130559.18	0.42
AGFG1	ENSG00000173744.17	0.42
ITCH	ENSG00000078747.12	0.42
UBA6	ENSG00000033178.12	0.42
SMC1A	ENSG00000072501.17	0.42
TCAF1P1	ENSG00000223459.5	0.42
YWHAG	ENSG00000170027.6	0.42
CORO1C	ENSG00000110880.10	0.42
IPO7	ENSG00000205339.9	0.42
SENP2	ENSG00000163904.12	0.42
MTPN	ENSG00000105887.10	0.42
EIF4E	ENSG00000151247.12	0.42
DNAJB14	ENSG00000164031.16	0.42
ABI1	ENSG00000136754.16	0.42
TMEM106B	ENSG00000106460.18	0.42
EIF3J	ENSG00000104131.12	0.42
SCRN3	ENSG00000144306.13	0.42
EIF4EP2	ENSG00000229944.3	0.41
WSB2	ENSG00000176871.8	0.41
DCTN4	ENSG00000132912.12	0.41
SLC33A1	ENSG00000169359.13	0.41
BZW1P2	ENSG00000198406.7	0.41
METTL2B	ENSG00000165055.15	0.41
HNRNPK	ENSG00000165119.18	0.41
CREB1	ENSG00000118260.14	0.41
RSRC1	ENSG00000174891.12	0.41
KCMF1	ENSG00000176407.17	0.41
PGK1	ENSG00000102144.13	0.41
NIPA1	ENSG00000170113.15	0.41
AGGF1	ENSG00000164252.12	0.41
SMG7	ENSG00000116698.20	0.41
ETF1	ENSG00000120705.12	0.41
KIAA1191	ENSG00000122203.14	0.41
UBE4A	ENSG00000110344.9	0.41
ASXL2	ENSG00000143970.16	0.41
HSPA8	ENSG00000109971.13	0.41
VDAC1	ENSG00000213585.10	0.41
RABL3	ENSG00000144840.8	0.41
C2orf49	ENSG00000135974.9	0.41
UBE3C	ENSG00000009335.17	0.41
YWHAQ	ENSG00000134308.13	0.41
GMFB	ENSG00000197045.12	0.41
CAMSAP2	ENSG00000118200.14	0.41
PPP2R5E	ENSG00000154001.13	0.41
TMED7-TICAM2	ENSG00000251201.8	0.41
ORC4	ENSG00000115947.13	0.41
MAP3K2	ENSG00000169967.16	0.41
API5	ENSG00000166181.12	0.41
NAA50	ENSG00000121579.12	0.41
FAM120A	ENSG00000048828.16	0.41
LDAH	ENSG00000118961.14	0.4
UCHL5	ENSG00000116750.13	0.4
AFF4	ENSG00000072364.12	0.4
RAD50	ENSG00000113522.13	0.4
ARF3	ENSG00000134287.9	0.4
ABCE1	ENSG00000164163.10	0.4
ADAM17	ENSG00000151694.12	0.4
DPP8	ENSG00000074603.18	0.4
NUS1P1	ENSG00000235636.1	0.4
RP11-56G10.2	ENSG00000257386.1	0.4
SMIM15	ENSG00000188725.7	0.4
DSCR3	ENSG00000157538.13	0.4
SENP5	ENSG00000119231.10	0.4
PAPD7	ENSG00000282558.1	0.4
RAB21	ENSG00000080371.5	0.4
VTA1	ENSG00000009844.15	0.4
UBE2D3	ENSG00000109332.19	0.4
RBM27	ENSG00000091009.7	0.4
CLINT1	ENSG00000113282.13	0.4
NAA15	ENSG00000164134.12	0.4
IDH3A	ENSG00000166411.13	0.4
TSR1	ENSG00000167721.10	0.4
WDFY3	ENSG00000163625.15	0.4
PIGX	ENSG00000163964.13	0.4
C2orf69	ENSG00000178074.5	0.4
DLD	ENSG00000091140.12	0.4
ARPP19	ENSG00000128989.10	0.4
POM121	ENSG00000196313.11	0.4
YIPF6	ENSG00000181704.11	0.4
PRMT3	ENSG00000185238.12	0.4
EIF4HP1	ENSG00000233830.2	0.4
PEX26	ENSG00000215193.12	0.4
GEMIN5	ENSG00000082516.8	0.4
SMAD1	ENSG00000170365.9	0.4
BZW1	ENSG00000082153.17	0.4
SDE2	ENSG00000143751.9	0.4
QSER1	ENSG00000060749.14	0.39
EXOSC2	ENSG00000130713.15	0.39
LMBR1	ENSG00000105983.19	0.39
PCC, Pearson correlation coefficient.
